# Supplementary material
Source: Springer Nature journal article supplement (https://www.springermedizin.de/resource/supplementary/12936_2013_3025_MOESM1_ESM.pdf/9544848)
Supplement: MOESM1 [file 9544848]

### Additional file 1. Study site classification

| Location    | ID | Latitude  | Longitude  | Sampling date | Settlement | Ecological zone (Ecozone) | Agricultural activity |
|-------------|----|-----------|------------|---------------|------------|---------------------------|-----------------------|
| Huni Valley | 1  | 5.473840N | 1.915080W  | 07/06/2011    | Rural      | Rainforest                | Dry cultivation       |
| Tarkwa      | 2  | 5.299550N | 01.993060W | 06/06/2011    | Urban      | Rainforest                | Dry cultivation       |
| Axim        | 3  | 4.864470N | 02.242630W | 06/06/2011    | Peri-urban | Rainforest                | Dry cultivation       |
| Twifo Praso | 7  | 5.608580N | 01.549260W | 21/06/2011    | Peri-urban | Deciduous forest          | Dry cultivation       |
| Assin Foso  | 9  | 5.689110N | 01.271450W | 21/06/2011    | Peri-urban | Deciduous forest          | Dry cultivation       |
| Akim Oda    | 11 | 5.913140N | 00.987610W | 30/06/2011    | Peri-urban | Deciduous forest          | Semi-irrigation       |
| Koforidua   | 15 | 6.094490N | 0.260930W  | 03/06/2011    | Urban      | Deciduous forest          | Semi-irrigation       |
| Somanya     | 16 | 6.103550N | 00.010570W | 20/06/2011    | Peri-urban | Deciduous forest          | Dry cultivation       |
| Akatsi      | 17 | 6.13396N  | 00.80092E  | 27/08/2011    | Peri-urban | Guinea savanna            | Semi-irrigation       |
| Takoradi    | 4  | 4.912170N | 1.773970 W | 16/06/2011    | Urban      | Coastal savanna           | Semi-irrigation       |
| Shama       | 5  | 5.011760N | 05.050180W | 19/06/2011    | Peri-urban | Coastal savanna           | Semi-irrigation       |
| Komenda     | 6  | 5.050180N | 05.050180W | 19/06/2011    | Peri-urban | Coastal savanna           | Semi-irrigation       |
| Swedru      | 10 | 5.529440N | 0.696980W  | 20/07/2011    | Urban      | Coastal savanna           | Dry cultivation       |
| Madina      | 12 | 5.668490N | 0.219280W  | 29/05/2011    | Urban      | Coastal savanna           | Semi-irrigation       |
| Dodowa      | 14 | 5.880970N | 0.107880W  | 20/05/2011    | Peri-urban | Coastal savanna           | Dry cultivation       |
| Cape Coast  | 8  | 5.108280N | 1.296770W  | 01/08/2011    | Urban      | Mangrove strand           | Semi-irrigation       |
| Ashaiman    | 13 | 5.693080N | 0.033230W  | 19/05/2011    | Peri-urban | Mangrove strand           | Semi-irrigation       |
| Keta        | 18 | 5.939940N | 0.996250E  | 26/08/2011    | Peri-urban | Mangrove strand           | Irrigation            |

Irrigation refers to “permanent water” created for rice farms. Semi-irrigation refers to temporary water created for vegetable farms. Dry cultivation refers to cash crop plantations (oil palm, rubber, and mango) that create little or no water containment.
